# Supplementary material for: Kidney Function Does Not Modify the Favorable Quality of Life Changes Associated With Revascularization for Coronary Artery Disease: Cohort Study
Source: PubMed Central journal article supplement — J Am Heart Assoc. 2016 Jul 19;5(7):e003642. doi: 10.1161/JAHA.116.003642 (PMC5015401; doi:10.1161/jaha.116.003642), 2016-07-19
Supplement: JAH3-5-e003642-s001.pdf [file JAH3-5-e003642-s001.pdf]

# SUPPLEMENTAL MATERIAL

## **Alberta Kidney Disease Network (AKDN) Investigators:**

Dr. Sofia Ahmed MD MSc FRCPC, University of Calgary; Dr. Aminu Bello MD PhD FRCP FACP FASN, University of Alberta; Dr. Sara Davison MD MSc FRCPC, University of Alberta, Dr. Brenda Hemmelgarn MD PhD FRCPC, University of Calgary; Dr. Matthew James MD PhD FRCPC, University of Calgary; Dr. Kailash Jindal MBBS FRCPC, University of Alberta; Dr. Scott Klarenbach MD MSc FRCPC, University of Alberta; Dr. Braden Manns MD MSc FRCPC, University of Calgary, Dr. Jennifer MacRae MD MSc FRCPC, University of Calgary; Dr. Neesh Pannu MD SM, FRCPC, University of Alberta; Dr. Robert Pauly MD MSc FRCPC, University of Alberta; Dr. Rob Quinn MD PhD FRCPC, University of Calgary; Dr. Pietro Ravani MD PhD FNCPSI, University of Calgary; Dr. Nairne Scott-Douglas MD PhD FRCPC, University of Calgary; Dr. Marcello Tonelli MD SM FRCPC, University of Calgary

## **Alberta Provincial Project for Outcomes Assessment in Coronary Heart Disease (APPROACH) Investigators:**

Dr. Fiona Clement PhD, University of Calgary; Dr. Lawrence de Koning PhD; Dr. Gabe Fabreau MD MPH FRCPC University of Calgary; Ms. P. Diane Galbraith MSc, University of Calgary; Dr. William Ghali MD MPH FRCPC, University of Calgary; Dr. Michelle Graham MD FRCPC, University of Alberta; Dr. Bryan Har MD MPH FRCPC, University of Calgary; Dr. Matthew James MD PhD FRCPC, University of Calgary; Dr. Merrill Knudtson MD FRCPC, University of Calgary; Dr. Colleen Norris MN PhD, University of Alberta;; Dr. Tolu Sajobi PhD, University of Calgary; Ms Danielle Southern MSc, University of Calgary; Dr. Steve Wilton MD MSc FRCPC, University of Calgary
